# Supplementary material
Source: publisher site journal article supplement (https://www.dovepress.com/article/262511)
Supplement: Supplementary file 1 [file get_supplementary_file.php]

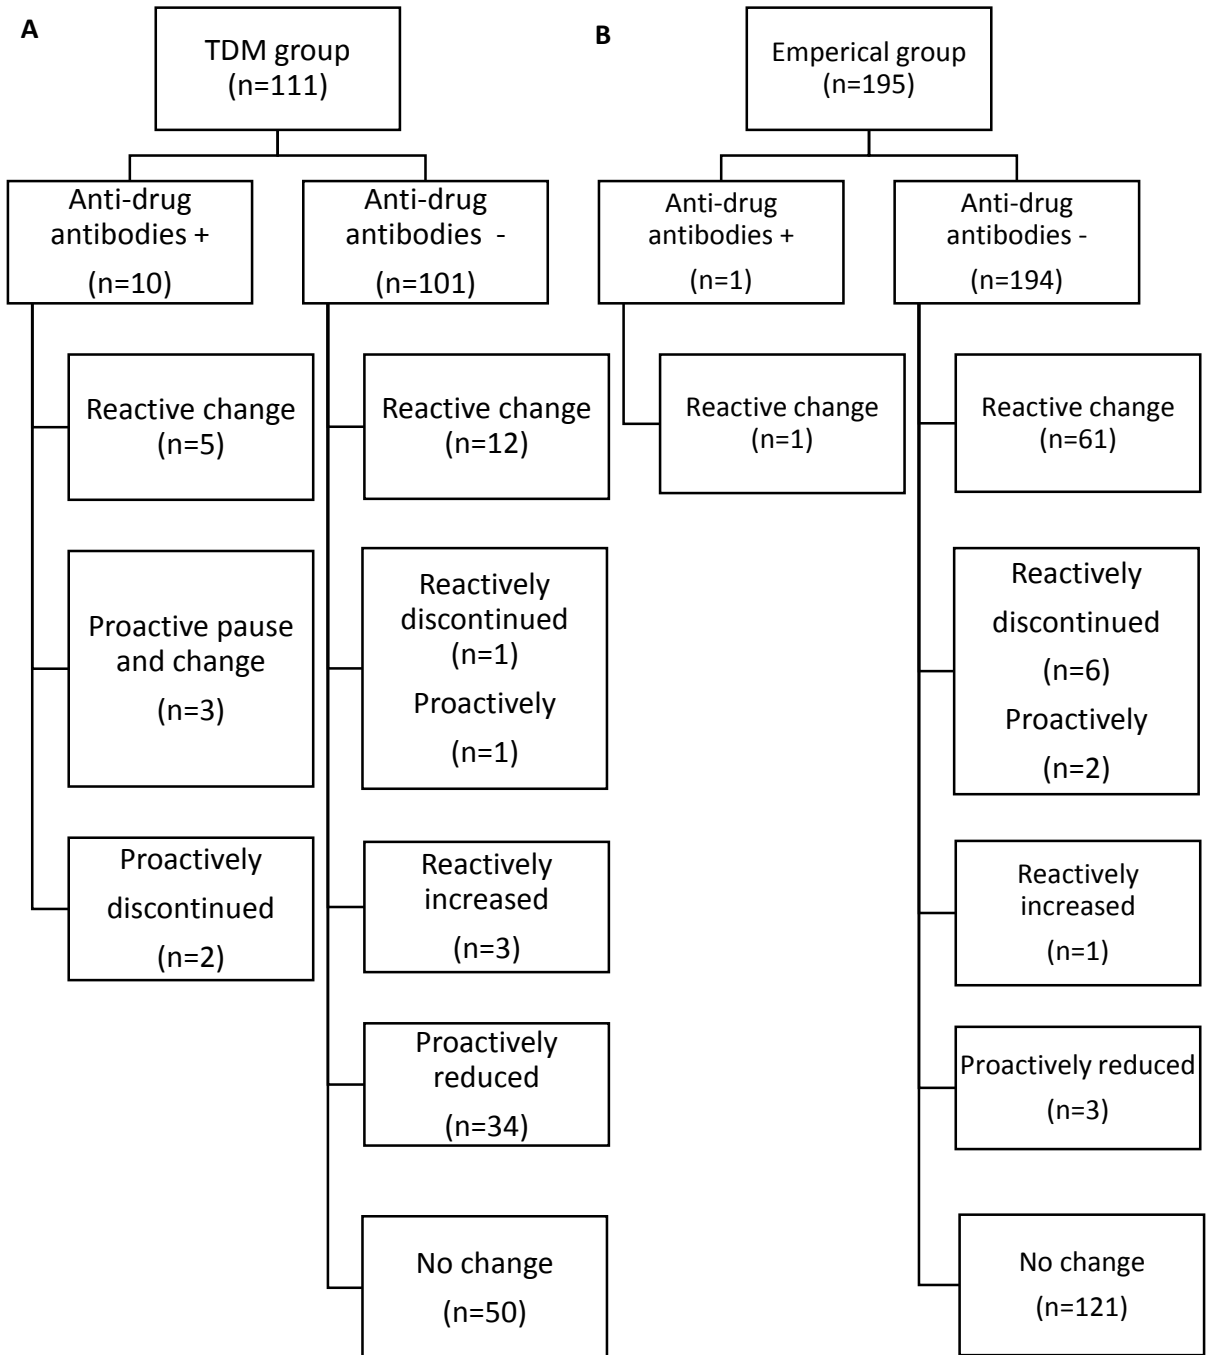

Supplementary figure 1. Changes in treatment based on TDM supported or empirical decision

| Therapy                   | Package              | Dose                         | Total cost/year | Cost per dosage/doses per year |
|---------------------------|----------------------|------------------------------|-----------------|--------------------------------|
| Infliximab                | 1 vial powder 100 mg | 5 mg/kg i.v. every 8 weeks   | €14.983*        | €2.305/6.5                     |
| 70% Infliximab            | 1 vial powder 100 mg | 3.5 mg/kg i.v. every 8 weeks | €10.491*        | €1.614/6.5                     |
| 130% Infliximab           | 1 vial powder 100 mg | 6.5 mg/kg i.v. every 8 weeks | €19.481*        | €2.997/6.5                     |
| Adalimumab                | 2 syringes 40 mg     | 40 mg every 2 weeks          | €16.822         | €647/26                        |
| Adalimumab (67%)          | 2 syringes 40 mg     | 40 mg every 3 weeks          | €10.999         | €647/17                        |
| Adalimumab (150%)         | 2 syringes 40 mg     | 40 mg every week             | €33.644         | €647/52                        |
| Etanercept                | 4 syringes 50 mg     | 50 mg every week             | €17.524         | €337/52                        |
| Etanercept (70%)          | 4 syringes 50 mg     | 50 mg every 10 days          | €12.132         | €337/36                        |
| Etanercept (140%)         | 4 syringes 50 mg     | 50 mg every 5 days           | €24.601         | €337/73                        |
| Golimumab                 | 1 syringe 50 mg      | 50 mg every month            | €20.052         | €1671/12                       |
| Certolizumab              | 2 syringes 200 mg    | 200 mg every 2 weeks         | €17.212         | €662/26                        |
| <u>Non-TNFi biologics</u> |                      |                              |                 |                                |
| Tocilizumab               | 4 syringes 162 mg    | 162 mg every week            | €18.460         | €710/52                        |
| Abatacept                 | 1 syringe 125 mg     | 125 mg every week            | € 19.188        | €369/52                        |
| Secukinumab               | 1 syringe 150 mg     | 150 mg every month           | € 8.604         | €717/12                        |
| Tofacitinib               | 56 tablets 5 mg      | 10 mg every day              | € 14.677        | €1.129/13                      |
| Ixekizumab                | 1 syringe 80 mg      | 80 mg every month            | €18.252         | €1.546/12                      |

Supplementary Table 1. Therapy cost of the different treatment strategies.

\*Dependent on body weight. The prices for infliximab in the table are standardized to a body weight of 70 kg, equivalent of 350 mg every 8 weeks as standard treatment

|                                          | All (n=306) | TDM guided<br>(n=111) | Empiric guided<br>(n=195) |
|------------------------------------------|-------------|-----------------------|---------------------------|
| Infliximab, n                            | 67          | 27                    | 40                        |
| In remission/low disease activity, n (%) | 49 (73)     | 20 (74)               | 29 (69)                   |
| Loss of response, n (%)                  | 14 (21)     | 5 (19)                | 9 (21)                    |
| Adverse events, n (%)                    | 4 (6)       | 2 (7)                 | 2 (5)                     |
| Adalimumab, n                            | 63          | 30                    | 33                        |
| In remission/low disease activity, n (%) | 48 (75)     | 26 (87)               | 22 (65)                   |
| Loss of response, n (%)                  | 9 (14)      | 4 (13)                | 5 (15)                    |
| Adverse events, n (%)                    | 6 (9)       | 0 (0)                 | 6 (18)                    |
| Etanercept, n                            | 137         | 46                    | 91                        |
| In remission/low disease activity, n (%) | 90 (65)     | 35 (76)               | 55 (59)                   |
| Loss of response, n (%)                  | 36 (26)     | 10 (22)               | 26 (28)                   |
| Adverse events, n (%)                    | 11 (8)      | 1 (2)                 | 10 (11)                   |
| Golimumab, n                             | 39          | 8                     | 31                        |
| In remission/low disease activity, n (%) | 30 (77)     | 8 (100)               | 22 (71)                   |
| Loss of response, n (%)                  | 7 (18)      | 0 (0)                 | 7 (23)                    |
| Adverse events, n (%)                    | 2 (5)       | 0 (0)                 | 2 (6)                     |

Supplementary Table 2. Clinical response at two years follow-up
